# Supplementary material
Source: ML conference proceedings conference paper supplement (https://openreview.net/forum?id=jWaXhCYTV1)
Supplement: supplementary_material [file attachment]

---

# Identifying General Mechanism Shifts in Linear Causal Representations

---

Tianyu Chen\* Kevin Bello<sup>†‡</sup> Francesco Locatello<sup>◇</sup> Bryon Aragam<sup>†</sup> Pradeep Ravikumar<sup>‡</sup>

\*Department of Statistics and Data Sciences, University of Texas at Austin

<sup>†</sup>Booth School of Business, University of Chicago

<sup>‡</sup>Machine Learning Department, Carnegie Mellon University

<sup>◇</sup>Institute of Science and Technology Austria

## Abstract

We consider the linear causal representation learning setting where we observe a linear mixing of  $d$  unknown latent factors, which follow a linear structural causal model. Recent work has shown that it is possible to recover the latent factors as well as the underlying structural causal model over them, up to permutation and scaling, provided that we have at least  $d$  environments, each of which corresponds to perfect interventions on a single latent node (factor). After this powerful result, a key open problem faced by the community has been to relax these conditions: allow for coarser than perfect single-node interventions, and allow for fewer than  $d$  of them, since the number of latent factors  $d$  could be very large. In this work, we consider precisely such a setting, where we allow a smaller than  $d$  number of environments, and also allow for very coarse interventions that can very coarsely *change the entire causal graph over the latent factors*. On the flip side, we relax what we wish to extract to simply the *list of nodes that have shifted between one or more environments*. We provide a surprising identifiability result that it is indeed possible, under some very mild standard assumptions, to identify the set of shifted nodes. Our identifiability proof moreover is a constructive one: we explicitly provide necessary and sufficient conditions for a node to be a shifted node, and show that we can check these conditions given observed data. Our algorithm lends itself very naturally to the sample setting where instead of just interventional distributions, we are provided datasets of samples from each of these distributions. We corroborate our results on both synthetic experiments as well as an interesting psychometric dataset. The code can be found at <https://github.com/TianyuCodings/iLCS>.

## 1 Introduction

The objective of learning disentangled representations is to separate the different factors that contribute to the variation in the observed data, resulting in a representation that is easier to understand and manipulate [3]. Traditional methods for disentanglement [e.g., 19, 20, 7, 9, 26] aim to make the latent variables independent of each other.

Consider the setting of linear independent component analysis (ICA) [19], that is, the observed variables  $X \in \mathbb{R}^p$  are generated through the process  $X = GZ$ , where  $Z \in \mathbb{R}^d$  are *latent* factors, and  $G \in \mathbb{R}^{p \times d}$  is an *unknown* “mixing” matrix. Under the key assumption that  $Z$  has statistically independent components, and under some additional mild assumptions, landmark results in linear ICA show that it is possible to recover the latent variables  $Z$  up to permutation and scaling [13, 19].

---

<sup>1</sup>Emails: tianyuchen@utexas.edu, kbello@cs.cmu.edu

However, what if instead of independent sources  $Z$  we have a *structural causal model* (SCM, [37, 38]) over them? For instance, if the latent factors correspond to biomarkers in a biology context, or root causes in a root cause analysis context, then we expect there to be rich associations between them. Indeed, this question is central in the burgeoning field of causal representation learning (CRL) [39, 51], where we are interested in extracting the latent factors and causal associations between them given raw data.

Let us look at the simplest CRL setting where the latent variables  $Z$  follow a *linear* SCM, that is,  $Z = AZ + \Omega^{1/2}\epsilon$ , where  $A \in \mathbb{R}^{d \times d}$  encodes a directed acyclic graph (DAG),  $\Omega$  is a diagonal matrix that controls the scale of noise variances, and  $\epsilon$  is some noise vector with zero-mean and unit-variance independent components. In such a case,  $Z$  is a linear mixing of independent components  $\epsilon$ , that is,  $Z = B^{-1}\epsilon$ , where  $B = \Omega^{-1/2}(I_d - A)$  succinctly encodes the SCM and  $I_d$  is the identity matrix of dimension  $\mathbb{R}^{d \times d}$ . We then have  $X = GB^{-1}\epsilon$  so that ICA can only recover  $BG^\dagger$  up to permutation and scaling, which does not suffice to recover the SCM  $B$  since the mixing function  $G$  is unknown.

Recently, Seigal et al. [40] showed that given the interventional distributions arising from *perfect interventions* on *each* latent variable in  $Z$ , we can recover the SCM over  $Z$  up to permutation. But there are two caveats to this: (a) it is difficult to obtain perfect single-node interventions that only intervene on a single factor in  $Z$ ; and (b) it is difficult to obtain  $d$  number of such perfect interventional distributions or environments.

We are interested in the setting where we do not have perfect interventions: we allow for far more general interventions that can quite coarsely change the SCM, namely, *soft* and *hard* interventions, interventions targeting *single* or *multiple* nodes, as well as interventions capable of *adding* or *removing* parent nodes and *reversing* edges. Moreover, we do not need as many as  $d$  of these.

Our goal, however, is not to recover the entire SCM over  $Z$  but simply to recover those nodes  $Z$  that have incurred shifts or changes between the different interventional distributions. This is closely related to root cause analysis [5, 6, 21, 33], which aims to identify the origins of the observed changes in a joint distribution. In addition, understanding the sources of distribution shifts—that is, localizing invariant/shifted conditional distributions—can benefit downstream tasks such as domain adaptation [30], and domain generalization [36, 55].

**Contributions.** Our work sits at the intersection of linear CRL [40, 23] and *direct estimation* of causal mechanism shifts [52, 14]. The key contribution of this work is to show that it is possible to identify the *latent* sources of distribution shifts in multiple datasets while *bypassing* the estimation of the mixing function  $G$  and the SCM  $B$  over the latent variables, under very general types of interventions. More concretely, we make the following set of contributions:

1. **Identifiability:** We show that we can identify the shifted latent factors even under more general types of interventions. (Section 4.1).
2. **Algorithm:** We also provide a scalable algorithm that implements our identifiability result to infer such shifted latent factors even in the practical scenarios where we are not given the entire coarse interventional distributions but merely finite samples from each (Section 4.2).
3. **Experiments:** We corroborate our results on both synthetic experiments (Section 5.1) as well as an interesting psychometric dataset (Section 5.2).

## 2 Related Work

**Causal representation learning.** In contrast to our setting, which focuses on identifying shifted nodes in the latent representation, existing methods in CRL aim to recover *both* the latent causal graph and the mixing function. Previous works have studied identifiability in various settings, such as latent linear SEMs with linear mixing [40], and with nonlinear mixing [4]; latent nonlinear SEMs with finite degree polynomial mixing [1], and with linear mixing [48]; and nonlinear SEMs with nonlinear mixing [50, 49, 23, 22]. Although these studies ensure the identifiability of causal graphs (up to permutation and scaling ambiguities), they generally rely on the assumption that *each latent variable* is intervened upon in at least one environment, necessitating access to at least  $d$  interventional distributions. Moreover, the aforementioned works assume specific types of interventions, such as hard/soft interventions and single-node interventions, and restrict changes in interventional distributions, disallowing edge reversals or the addition of new edges. The most

recent work [23] enables causal representation learning under general interventions in latent linear SEMs with linear mixing. However, this approach still requires the assumption that the number of environments  $K$  is at least equal to the number of latent nodes  $d$  and that there are at least  $\Theta(d^2)$  interventions. If the objective is to detect variables with general mechanism changes across multiple environments—environments that may lack a consistent topological order and sufficient interventions or environments—using existing CRL methods to recover each latent graph becomes overly restrictive or even infeasible. In contrast, we present a more flexible approach, enabling the identification of shifted variables without assuming restrictive interventions per environment or a consistent topological order of the latent graphs.

**Direct estimation of mechanism shifts.** The problem of directly estimating causal mechanism changes *without* estimating the causal graphs has also been explored in various settings in the regime in which the causal variables are observable. Wang et al. [52] and Ghoshal et al. [14] have focused on identifying structural differences, assuming linear SEMs as environments, and proposing methods that take advantage of variations in the precision matrices. More recently, Chen et al. [10] studied this problem for nonlinear additive noise models, assuming that the environments originate from soft/hard interventions and leverage recent work in causal discovery via score matching. Finally, the concept of detecting/localizing feature shifts between two distributions has also been discussed in [27], although from a non-causal perspective. To our knowledge, there is a gap in the literature regarding the study of these objectives when considering latent causal variables. We address this gap by proposing a novel approach for directly detecting mechanism shifts within the latent SCMs.

**Independent component analysis.** The application of independent component analysis (ICA) [12] in the realm of causal discovery has seen significant developments. Linear ICA [19] and its nonlinear counterpart [20] have been instrumental in causal discovery [35, 44, 53] and more recently in causal latent discovery [23]. Beyond these established applications, our work uncovers a novel use of ICA, namely, identifying shifted nodes within the latent linear SCMs.

Given the relevance of ICA for our approach, we briefly recap it next. ICA considers the following setting:  $X = W\epsilon$  where  $X \in \mathbb{R}^p$ ,  $\epsilon \in \mathbb{R}^d$ ,  $p \geq d$ . A key assumption in ICA is that each component of  $\epsilon$  is independent. Given only observations of  $X$ , the goal of ICA is to estimate both  $W$  and  $\epsilon$ . The objective function typically aims to maximize negentropy or non-Gaussianity, with further details given in [19]. The identifiability results of ICA can be summarized as follows.

**Theorem 1** (Theorems 3,4 in [13]). *If every component of  $\epsilon$  is independent and at most one component is Gaussian distributed, with  $W$  being full column rank, then ICA can estimate  $W$  up to a permutation and scaling of each column, and  $\epsilon$  can be recovered for some permutation up to scaling for each component. Furthermore, as noted in [19], if  $\mathbb{E}[\epsilon_i^2] = 1, \forall i \in [d]$ , the estimated  $W$  and  $\epsilon$  will have ambiguities only in permutation and sign. Formally, this means*

$$X = W\epsilon = (WP^T D)(DPe),$$

where  $P$  is a permutation matrix and  $D$  is a diagonal matrix with diagonal entries  $\pm 1$ . Then, the best estimate given by ICA is  $WP^T D$  and  $DPe$ .

### 3 Problem Setting

Consider a random vector  $X$  in  $\mathbb{R}^p$  that is a linear mixing of  $d$  latent variables  $Z = (Z_1, \dots, Z_d)$ :

$$X = GZ.$$

Here the latent variables in  $Z$  follows a linear SCM [37, 38], that is,

$$Z = AZ + \Omega^{1/2}\epsilon$$

where  $A \in \mathbb{R}^{d \times d}$  corresponds to a DAG  $\mathcal{G}$  such that  $A_{jk} \neq 0$  iff there exists an edge  $j \rightarrow k$  in the DAG  $\mathcal{G}$ ;  $\Omega \in \mathbb{R}^{d \times d}$  is a diagonal matrix with positive entries, and  $\epsilon \in \mathbb{R}^d$  is a random vector with independent components with mean zero and variance one, i.e., that  $\text{Cov}(\epsilon) = I_d$ . Denoting  $B = \Omega^{-1/2}(I_d - A)$ , we have that:

$$Z = B^{-1}\epsilon.$$

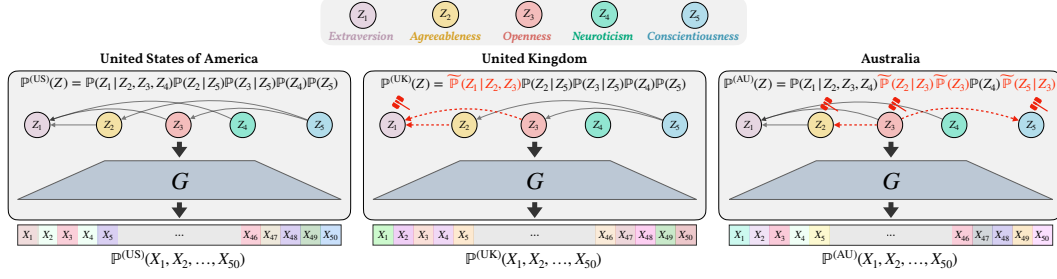

Figure 1: We have 5 *latent* variables  $Z$  which in this case relate to personality concepts, and the observations  $X$  represent the scores of 50 questions from a psychometric personality test. The latent variables  $Z$  follow a linear SCM, while the *unknown* shared linear mixing is a full-rank matrix  $G \in \mathbb{R}^{50 \times 5}$ . Then, for environment  $k = \{\text{US}, \text{UK}, \text{AU}\}$ , the observables are generated through  $X^{(k)} = GZ^{(k)}$ . Here,  $\mathbb{P}^{(\text{US})}$  is taken as the “observational” (reference) distribution, and the distribution shifts in  $\mathbb{P}^{(\text{UK})}$  and  $\mathbb{P}^{(\text{AU})}$  are due to changes in the causal mechanisms of  $\{Z_1\}$  and  $\{Z_2, Z_3, Z_5\}$ , respectively. Finally, the types of interventions are general; for UK, the edge  $Z_4 \rightarrow Z_1$  is removed and the dashed red lines indicate changes in the edge weights to  $Z_1$ ; for AU,  $Z_2$  was intervened by removing  $Z_5 \rightarrow Z_2$  and adding  $Z_3 \rightarrow Z_2$ , while the edge  $Z_5 \rightarrow Z_3$  was reversed, thus changing the mechanisms of  $Z_3$  and  $Z_5$ . Thus, we aim to identify  $\{Z_1\}$  and  $\{Z_2, Z_3, Z_5\}$ .

We assume that we observe  $K \geq 2$  generalized interventional distributions that keep the mixing map  $G$  fixed but allow for generalized interventions to  $Z$ . That is, for environment  $k \in [K]$  we have,

$$X^{(k)} = GZ^{(k)},$$

where  $Z^{(k)} = A^{(k)}Z^{(k)} + (\Omega^{(k)})^{1/2}\epsilon^{(k)}$ . Similarly, we have  $Z^{(k)} = (B^{(k)})^{-1}\epsilon^{(k)}$ , where  $B^{(k)} = (\Omega^{(k)})^{-1/2}(I_d - A^{(k)})$ .

Notably, we allow generalized interventions that allow for  $A^{(k)}$  to be arbitrary, which includes *soft* and *hard* interventions, interventions targeting *single* or *multiple* nodes, as well as interventions capable of *adding* or *removing* parent nodes and *reversing* edges. This contrasts with the existing literature on CRL, where single-node soft/hard interventions are the standard assumption [50, 40, 4, 1]. See Figure 1, for a toy example of what we aim to estimate.

**Remark 1.** Since we allow for general types of interventions, we can take any of the given environments as the canonical “observational” distribution with respect to which we observe interventions, or simply that we observe  $k$  interventions of an unknown observational distribution. This is a clear distinction from the standard setting in CRL [1, 50, 48, 23] which requires to know which environment is a suitable observational distribution.

To develop our identifiability result and algorithm, we will make additional assumptions on the noise distributions of the linear SEMs.

**Assumption A** (Noise Assumptions). For any environment  $k \in [K]$ , let  $\epsilon^{(k)} = (\epsilon_1^{(k)}, \dots, \epsilon_d^{(k)})$  be the vector of  $d$  independent noises with  $\text{Cov}(\epsilon^{(k)}) = I_d$ . We have:

1. *Identically distributed across environments:*  $\mathbb{P}(\epsilon^{(k)}) = \mathbb{P}(\epsilon^{(k')})$ , for all  $k' \neq k$ .
2. *Non-Gaussianity:* At most one noise component  $\epsilon_i^{(k)}$  is Gaussian distributed.
3. *Pairwise differences:* For any  $i \neq j$ , we have  $\mathbb{P}(\epsilon_i^{(k)}) \neq \mathbb{P}(\epsilon_j^{(k)})$  and  $\mathbb{P}(\epsilon_i^{(k)}) \neq \mathbb{P}(-\epsilon_j^{(k)})$ .

Assumption A.1 is usually assumed for learning causal models from multiple environments [31, 4]. Assumption A.2 is typically made in causal discovery methods, as detailed in seminal works such as [43, 42, 19, 45] and is considered a more realistic assumption [34]. Assumption A.3 is generally satisfied in a generic sense; that is, when probability distributions on the real line are randomly selected, they are pairwise different with probability one. This assumption is also adopted in [47, 23].

**Assumption B** (Test Function). We assume access to a test function  $\psi$  that maps each noise r.v. to  $\mathbb{R}$  s.t.  $\psi(\epsilon_i^{(k)}) = \psi(-\epsilon_i^{(k)})$ , and  $\psi(\epsilon_i^{(k)}) \neq \psi(\epsilon_j^{(k)})$  if  $\epsilon_i^{(k)}$  and  $\epsilon_j^{(k)}$  are not identically distributed.

This assumption states that we can access a test function that can help differentiate the noise components. One coarse example is  $\psi(y) = \mathbb{P}(|y| \leq 1)$ . This assumption is introduced to better understand our method workflow in Section 4, but it is not completely necessary. We discuss how to relax this assumption in Appendix C. Next, we formally define a mechanism shift.

**Definition 1** (Latent Mechanism Shifts). *Let  $\text{PA}(Z_i^{(k)})$  denote the set of parents of  $Z_i^{(k)}$ . A latent variable  $Z_i$  is called a latent shifted node within environments  $k$  and  $k'$ , if and only if:*

$$\mathbb{P}(Z_i^{(k)} \mid \text{PA}(Z_i^{(k)})) \neq \mathbb{P}(Z_i^{(k')} \mid \text{PA}(Z_i^{(k')})).$$

**Remark 2.** *Following Definition 1,  $Z_i$  is a latent shifted node between environments  $k$  and  $k'$  if: (1) The  $i$ -th rows of  $A^{(k)}$  and  $A^{(k')}$  are different; (2)  $\Omega_{ii}^{(k)} \neq \Omega_{ii}^{(k')}$ ; or (3) both.*

Definition 1 aligns with those previously discussed in [52, 14, 10], with the key difference that we consider changes in the causal mechanisms of the latent causal variables. However, note that our results also contribute to the setting in which causal variables are observable considering that the mixing function is the identity matrix, that is,  $G = I_d$ .

## 4 Identifying Shifts in Latent Causal Mechanisms

Following the setup outlined in the previous section, our focus now turns to developing an algorithm to identify latent shifted nodes, given data from multiple environments. First, note that we can write the overall model as a linear ICA problem, where, for any environment  $k$ , the observation  $X^{(k)}$  is a linear combination of independent components  $\epsilon^{(k)}$ . Specifically, we have

$$X^{(k)} = GZ^{(k)} = G(B^{(k)})^{-1}\epsilon^{(k)}$$

Under the mild conditions given in Assumption A, from classical ICA identifiability results stated in Theorem 1, we can identify  $G(B^{(k)})^{-1}$  up to permutation and sign flip. Let  $M^{(k)} = B^{(k)}H$  where  $H = G^\dagger$ . Then, we can only identify  $M^{(k)}$  up to permutation and sign flip, which does not suffice to identify the latent SCM encoded in  $B^{(k)}$ . In sum, what we can only obtain from ICA is

$$\bar{M}^{(k)} = P^{(k)}D^{(k)}B^{(k)}H$$

where  $P^{(k)}$  is a permutation matrix, and  $D^{(k)}$  is a diagonal matrix with  $-1$  or  $+1$  on its diagonal. As Seigal et al. [40] points out, it is not possible to identify  $B^{(k)}$  further given *generalized interventions*. Our first result is that our present mild assumptions suffice to infer shifted nodes.

**Theorem 2** (Identifiability). *Given access to  $K \geq 2$  environments, assume that A and B hold for all environments. Then, all latent shifted nodes are identifiable.*

An interesting facet of our identifiability result is that it is *constructive*. In the next subsection we will provide an explicit algorithm to infer the shifted nodes and prove the main theorem above.

### 4.1 Constructive identifiability

Consider  $\epsilon^{(k)} = B^{(k)}HX^{(k)}$  and  $\bar{\epsilon}^{(k)} = \bar{M}^{(k)}X^{(k)} = P^{(k)}D^{(k)}B^{(k)}HX^{(k)} = P^{(k)}D^{(k)}\epsilon^{(k)}$ , where  $\bar{\epsilon}^{(k)}$  and  $\bar{M}^{(k)}$  are the output of ICA, which contain the permutation and sign flip ambiguities given by  $P^{(k)}D^{(k)}$ .

Obtaining a consistent ordering of the noise components across all environments is equivalent to finding  $P^{(k)}$ . Under Assumption B, and without loss of generality, we consider that  $(\epsilon_1^{(k)}, \dots, \epsilon_d^{(k)})$  are in increasing order with respect to their  $\psi$  values. Since  $\psi$  is invariant to sign flip, we can calculate  $\psi(\bar{\epsilon}_i^{(k)})$  for all  $i \in [d]$  and sort the calculated  $\psi$  values in increasing order. Let  $\bar{P}^{(k)}$  denote the sorting permutation with respect to  $\psi$ , so that post-sorting, we get  $\bar{P}^{(k)}\bar{\epsilon}^{(k)}$ .

**Remark 3.** *In Appendix C, we discuss how to relax the assumption on the test function  $\psi$ .*

**Proposition 1.**  $\bar{P}^{(k)} = (P^{(k)})^T$ , i.e.,  $\bar{P}^{(k)}$  is the inverse permutation of the ICA scrambling.

From Proposition 1, we thus find that we can unscramble the permutation  $P^{(k)}$  by sorting with respect to  $\psi$ . We get  $\bar{P}^{(k)}\bar{\epsilon}^{(k)} = \bar{P}^{(k)}P^{(k)}D^{(k)}\epsilon^{(k)} = D^{(k)}\epsilon^{(k)}$  from the above proposition. In other words, we can extract  $\tilde{\epsilon}^{(k)} = D^{(k)}\epsilon^{(k)}$  via  $\tilde{M}^{(k)} = \bar{P}^{(k)}\bar{M}^{(k)} = D^{(k)}B^{(k)}H = D^{(k)}M^{(k)}$  after ICA and sorting by  $\psi$ .

**Proposition 2.** Given access to  $K \geq 2$  environments, assume that **A** holds. Then,  $Z_i$  is identified as a latent non-shifted node between environments  $k$  and  $k'$  if and only if  $M_i^{(k)} = M_i^{(k')}$ , where  $M_i^{(k)}$  represents the  $i$ -th row of  $M^{(k)}$ , and  $M^{(k)} = B^{(k)}H$ .

All formal proofs are given in Appendix E. Our next result shows the identifiability of shifted nodes in the unscrambled matrix  $\widetilde{M}^{(k)}$ .

**Theorem 3.**  $Z_i$  is identified as a non-shifted node if and only if  $\widetilde{M}_i^{(k)} = \widetilde{M}_i^{(k')}$  or  $\widetilde{M}_i^{(k)} = -\widetilde{M}_i^{(k')}$ .

We can summarize this in the following algorithm, which proves Theorem 2:

- Perform ICA to obtain  $\overline{M}^{(k)}$  and  $\bar{\epsilon}^{(k)}$  with input  $X^{(k)}$ .
- Sort by  $\psi$  to get the permutation  $\overline{P}^{(k)}$  and compute  $\widetilde{M}^{(k)} = \overline{P}^{(k)}\overline{M}^{(k)}$  and  $\tilde{\epsilon}^{(k)} = \overline{P}^{(k)}\bar{\epsilon}^{(k)}$ .
- Check the condition on  $\{\widetilde{M}_i^{(k)} : k \in [K]\}$  to detect if  $Z_i$  is a shifted node, as prescribed by Theorem 3.

## 4.2 Finite-sample algorithm

Thus far, we have considered the population setting where we are given the entire interventional distributions. In practice, we are given samples from each of these interventional distributions, so that we have  $K$  datasets, one for each of the interventional distributions. The overall algorithm is given next in Alg. 1 (see illustration in Appendix B) with detailed explanations following the algorithm.

---

### Algorithm 1 iLCS: Identifying Latent Causal Mechanisms Shifts

---

**Require:** Datasets  $\{X^{(k)}\}_{k=1}^K$  and threshold  $\alpha$  (e.g., 0.5)

Calculate covariance matrix  $\Sigma^{(k)}$  from  $X^{(k)}$  for all  $k$

$$d = \max_{k=1, \dots, K} \text{rank}(\Sigma^{(k)})$$

**for**  $k = 1, \dots, K$  **do**

//Step 1:  $\bar{\epsilon}^{(k)}$  is samples from  $\bar{\epsilon}^{(k)}$

$\bar{\epsilon}^{(k)}, \overline{M}^{(k)} \leftarrow \text{ICA}(X^{(k)}, d)$

Calculate  $\hat{\psi}(\bar{\epsilon}^{(k)}) = [\hat{\psi}(\bar{\epsilon}_1^{(k)}), \hat{\psi}(\bar{\epsilon}_2^{(k)}), \dots, \hat{\psi}(\bar{\epsilon}_d^{(k)})]$

//Step 2

sorted\_idx  $\leftarrow \text{argsort}(\hat{\psi}(\bar{\epsilon}^{(k)}))$

$\widetilde{M}^{(k)} \leftarrow \overline{M}^{(k)}[\text{sorted\_idx}, :]$

Initialize  $S^{(k, k')} = \emptyset$ , for all  $k \neq k'$

**for**  $i = 1, \dots, d$  **do**

**for**  $k \neq k'$  **do**

Calculate  $L_i^{k, k'}$

// Step 3

**if**  $L_i^{k, k'} > \alpha$  **then**

$S^{(k, k')} \leftarrow S^{(k, k')} \cup \{i\}$

**Ensure:** All latent shifted nodes  $S = (S^{(k, k')})_{k, k'}$

---

**Step 1:** We perform ICA with samples from  $X^{(k)}$  to extract  $\overline{M}^{(k)}$  and samples from  $\bar{\epsilon}^{(k)}$ .

**Remark 4** (Estimation of  $d$ ). One missing component in using ICA in practice is that, along with samples from  $X^{(k)}$ , we need to input the number of latent nodes  $d$ , which need to be estimated from samples. Define  $\Sigma^{(k)} = \mathbb{E}[X^{(k)}X^{(k)T}] = G(B^{(k)})^{-1}(B^{(k)})^{-T}G^T$ . Since all matrices are full rank, it follows that  $d = \text{rank}(\Sigma^{(k)})$ , where  $\Sigma^{(k)}$  can be estimated by the sample covariance matrix. Thus,  $d$  can also be estimated by the rank of the sample covariance matrix.

**Step 2:** We compute the empirical expectation of  $\psi$  on samples from  $\bar{\epsilon}^{(k)}$ , which by law of large number arguments, converges to its population expectation, which is  $\psi(\bar{\epsilon}^{(k)})$ . We use the sorted order of the empirical expectations to sort the noise components, unscrambling the noise components as earlier, to get  $\widetilde{M}^{(k)}$  and samples from  $\tilde{\epsilon}^{(k)}$ .



**Step 3:** Here, we explicitly construct a test statistic to check the condition on  $\{\widetilde{M}_i^{(k)} : k \in [K]\}$  to detect if  $Z_i$  is a shifted node. Note that from our Theorem 3, there is a non-shift node  $Z_i$  between environments  $k$  and  $k'$  if and only if  $\widetilde{M}_i^{(k)} = \pm \widetilde{M}_i^{(k')}$ . Accordingly, we define a test statistic:

$$L_i^{k,k'} = \frac{\min\{\|\widetilde{M}_i^{(k)} \pm \widetilde{M}_i^{(k')}\|_1}{\|\widetilde{M}_i^{(k)}\|_1 + \|\widetilde{M}_i^{(k')}\|_1}$$

It can be seen that  $L_i^{k,k'} = 0$  if and only if  $\widetilde{M}_i^{(k)} = \pm \widetilde{M}_i^{(k')}$ , which implies node  $Z_i$  is not shifted between environments  $k$  and  $k'$ . Thus, in step three of the algorithm above, for each coordinate  $i \in [d]$ , we check if there exists  $k \neq k'$  such that  $L_i^{k,k'} > \alpha$  for a given threshold  $\alpha$ . If such a  $k \neq k'$  exists, we include  $i$  in the list of shifted nodes.

Algorithm 1 is consistent with the ground truth set of shifted nodes as  $n$  approaches infinity. Empirical evidence supporting this claim is presented in Figure 2, which shows that with a sufficiently large sample size, all shifted nodes are correctly identified, and the F1 score reaches 1. Further theoretical discussion on the sample complexity of our method can be found in Appendix D.

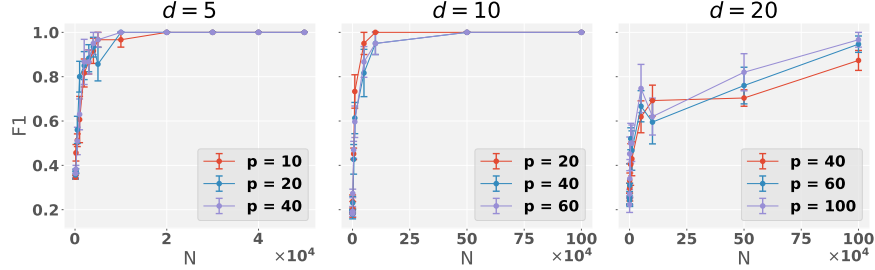

Figure 2: Illustration of the efficacy of our method in accurately identifying latent shifted nodes as the sample size increases, for ER2 graphs. In the first subplot, for a latent graph with  $d = 5$  nodes, we examine scenarios with observed dimensions  $p = 10, 20, 40$  and plot their corresponding F1 scores against the number of samples  $n$ . It is observed that the F1 score approaches 1 with a sufficiently large sample size. Detailed experimental procedures and results are discussed in Section 5.

## 5 Experiments

In this section, we investigate the performance of our method in synthetic and real-world data.

### 5.1 Synthetic Data

In our setup, each noise component  $\epsilon_i$  is sampled from a generalized normal distribution with the probability density function given by  $p(\epsilon_i) \propto \exp\{-|\epsilon_i|^q\}$ , where  $i = 1, 2, \dots, d$ . In this noise generation process, the noise vector  $\epsilon$  adheres to the condition  $\psi(\epsilon_i) < \psi(\epsilon_j)$  for all  $i < j$  if we choose  $\psi(y) = \mathbb{P}(|y| \leq 1)$ . Following the methodology similar to that in [40], we start by sampling either an Erdős-Rényi (ER) or Scale-Free (SF) graph with  $d$  nodes and an expected edge count of  $md$ , where  $m \in \{2, 4, 6\}$ , denoted as *ERm* or *SFm*. The observed space dimension  $p$  is set to  $2d$ . For each graph, the weights are independently sampled from  $\text{Unif} \pm [0.25, 1]$  and the diagonal entries of  $\Omega$  from  $\text{Unif}[2, 4]$ . In each environment  $k$ , 15% of the nodes are randomly selected for shifting. The new weights  $A_i^{(k)}$  for the shifted node  $i$ , and the new entries of  $\Omega^{(k)}$ , specifically  $\Omega_{ii}^{(k)}$ , are independently sampled from  $\text{Unif}[6, 8]$ . The mixing function  $G$  is independently generated from  $\text{Unif}[-0.25, 0.25]$ .

Empirically, we have observed that the following formulation of  $L_i^{k,k'}$  leads to improved results:

$$L_i^{k,k'} = \frac{\left| \|\widetilde{M}_i^{(k)}\|_1 - \|\widetilde{M}_i^{(k')}\|_1 \right|}{\|\widetilde{M}_i^{(k)}\|_1 + \|\widetilde{M}_i^{(k')}\|_1},$$

Table 1: Performance metrics for shifted node detection across various graph configurations, sample sizes  $n = 10^6$ .

| Graph Type | $p$ | $d$ | Precision | Recall | F1 Score | Time (s) |
|------------|-----|-----|-----------|--------|----------|----------|
| ER2        | 10  | 5   | 1.000     | 1.000  | 1.000    | 1.23     |
|            | 20  | 10  | 1.000     | 1.000  | 1.000    | 3.84     |
|            | 40  | 20  | 0.933     | 0.833  | 0.873    | 10.34    |
|            | 60  | 30  | 0.680     | 0.700  | 0.689    | 20.06    |
|            | 80  | 40  | 0.610     | 0.600  | 0.605    | 30.59    |
| ER4        | 20  | 10  | 1.000     | 1.000  | 1.000    | 3.89     |
|            | 40  | 20  | 0.933     | 0.933  | 0.933    | 9.39     |
|            | 60  | 30  | 0.617     | 0.600  | 0.607    | 30.83    |
|            | 80  | 40  | 0.610     | 0.617  | 0.613    | 32.08    |
| SF2        | 10  | 5   | 0.900     | 0.900  | 0.900    | 1.64     |
|            | 20  | 10  | 1.000     | 1.000  | 1.000    | 3.84     |
|            | 40  | 20  | 0.807     | 0.833  | 0.817    | 15.85    |
|            | 60  | 30  | 0.730     | 0.750  | 0.739    | 22.12    |
|            | 80  | 40  | 0.667     | 0.667  | 0.667    | 30.29    |
| SF4        | 20  | 10  | 1.000     | 1.000  | 1.000    | 3.13     |
|            | 40  | 20  | 0.967     | 0.900  | 0.927    | 15.12    |
|            | 60  | 30  | 0.725     | 0.700  | 0.711    | 29.79    |
|            | 80  | 40  | 0.539     | 0.533  | 0.535    | 30.84    |

where  $|\widetilde{M}_i^{(k)}|$  denotes the element-wise absolute value of the vector  $\widetilde{M}_i^{(k)}$ . We will utilize the new formula of  $L_i^{k,k'}$  to detect shifts in the following experiment. Then we explore sample sizes  $n$  from 500 to  $10^6$ , using the observed samples  $X^{(k)}$  as input. The parameter  $\alpha$  is set to 0.2 for  $d \leq 10$  and 0.5 for higher dimensions, reflecting the increased complexity in estimating larger dimensional latent graphs and thus necessitating a higher tolerance for  $L_1$  norm differences in detecting shifted nodes. For each setting, we independently generate 10 datasets and take the average of the metrics. The results for  $n = 10^6$  are shown in Table 1, and the asymptotic consistency results for specific  $p$  values are illustrated in Figure 2. In addition to the causal representative setting, our method can also directly identify mechanism shifts in a fully observed setting, where  $G = I$ . We further compare our method’s results in this fully observed setting against the baseline DCI [52], which addresses direct mechanism shifts in linear settings. The results of this comparison are provided in Appendix F, demonstrating that our method outperforms DCI in most settings.

## 5.2 Psychometrics Data

We evaluate our method using a dataset related to the Five Factor Model, also known as the Big Five personality traits [16, 15, 32]. This model is a widely accepted framework, comprising five broad dimensions that encapsulate the diversity of human personality traits. These dimensions are *Openness to Experience*, *Conscientiousness*, *Extraversion*, *Agreeableness*, and *Neuroticism*.

The dataset utilized in our study was gathered through an interactive online personality test available on OpenPsychometrics.org, a nonprofit endeavor aimed at educating the public about psychology while collecting data for psychological research<sup>1</sup>. This dataset encompasses responses to 50 questions, with 10 questions dedicated to each of the five personality dimensions. Participants responded to each question on a scale from 1 to 5. Additionally, the dataset includes demographic information, such as race, age, gender, and country, comprising a total of 19,719 observations.

**Question formalization and data processing.** In this study, we hypothesize the existence of 5 latent nodes, each representing one of the five personality dimensions, believed to be causally related. The score responses to the 50 questions form our observed space. Our main goal is to determine whether variations in personality dimensions can be observed across genders, thus treating gender as one environment ( $K = 2$ ). Additionally, we investigate potential personality shifts across countries, selecting the US and UK for analysis due to they have the most observations in our dataset. The only preprocessing step undertaken involves the removal of observations with missing values and the

<sup>1</sup>The data can be downloaded via the link: <https://www.kaggle.com/datasets/lucasgreenwell/ocean-five-factor-personality-test-responses/data>



normalization of data to fit within the  $[0, 1]$  range, achieved by adjusting according to the maximum and minimum values observed. The research question we have formalized in this study is not derived from any data competition. It aligns with interests explored in existing psychological literature [25, 8, 46, 29], yet our investigation is distinguished by a unique analytical framework.

**Labeling latent nodes.** Prior to detecting shifted nodes, it is essential to assign semantics to each node. This process involves conducting interventions on each component of the noise vector to aid in labeling the latent nodes. Given that the noise components are distinct for each latent node, labeling the noise effectively equates to labeling the latent nodes.

Initially, we apply ICA to the data for males, followed by getting post-sorting  $\tilde{M}^{male}$  and  $\tilde{\epsilon}^{male}$  as outlined in our methodology. Subsequently, we perform interventions on each noise component, setting each to 0 sequentially, and then re-mixing the intervened noise vector using  $(\tilde{M}^{male})^\dagger$ . By examining the impact of these interventions on the observation space — specifically, identifying which question scores undergo significant changes — we can assign appropriate semantic labels to each latent node index. For instance, nullifying the first column of  $\tilde{\epsilon}$  and remixing the intervened noise with  $(\tilde{M}^{male})^\dagger$  alters the score distribution in a manner that reveals the semantic domain affected by the first noise component. An example of assigning the label *Agreeableness* to a latent node is depicted in Figure 3. By applying the same process to all noise components, we are able to assign semantic labels *Openness*, *Conscientiousness*, *Extraversion*, and *Neuroticism* to the remaining latent nodes. More detailed experiment results are shown in Section G.

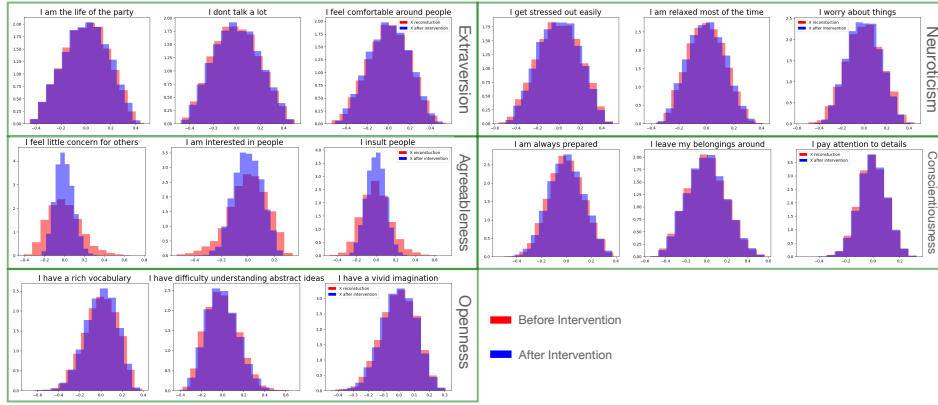

Figure 3: We apply an intervention to the first column of  $\epsilon$  and then use  $(\tilde{M}^{male})^\dagger$  for remixing. The first row of the resulting histograms represents scores for 5 out of the 10 questions related to the Extraversion personality dimension. Subsequent rows display histograms for 5 questions from each of the other four personality dimensions, as indicated at the right end of each row. The red distribution represents the scores before the intervention on the noise, while the blue distribution corresponds to scores after the intervention. Overlapping areas are shown in purple. Notably, the intervention on the first column of  $\epsilon$  alters the distribution in the observed space, specifically affecting the scores for questions related to the *Agreeableness* personality dimension, whereas distributions for other dimensions remain unchanged. Consequently, we can label the first noise component as corresponding to *Agreeableness*.

**Shifted nodes detection.** To identify shifted personality dimensions across gender, we computed  $L_i^{male, female}$  for each latent node, obtaining values of  $\{0.074, 0.0497, 0.078, 0.638, 0.633\}$ . Setting a tolerance threshold  $\alpha = 0.5$  to accommodate real data estimation variances, we observed that the last two nodes exhibit significantly higher  $L_i^{male, female}$  scores, surpassing  $\alpha$ , and thus are considered shifted. These nodes correspond to the labels *Neuroticism* and *Extraversion*. Consistent with existing psychological literature, women have been found to score higher in *Neuroticism* than men [25, 8, 46, 29], while men scored higher in the Activity subcomponent of *Extraversion* [8]. This discovery aligns with the findings in psychology literature. To further validate our method’s effectiveness, a similar analysis was conducted across countries, comparing the UK and the US, which have the most observations in our dataset. The computed  $L_i^{US, UK}$  for each latent node was  $\{0.302, 0.258, 0.109, 0.189, 0.088\}$ . All values fell below  $\alpha$ , indicating no latent node shifts between

these two countries. This finding is also in agreement with existing studies that personality exhibits stability across countries and cultures [25, 24, 11].

## 6 Concluding Remarks

In this study, we demonstrated that latent mechanism shifts are identifiable, up to a permutation, within the framework of linear latent causal structures and linear mixing functions. Furthermore, we introduced an algorithm, grounded in ICA, designed to detect these shifts. Our method offers a broader applicability to various types of interventions compared to CRL framework. Unlike shift detection methods where node variables are directly observable, our approach extends to scenarios where latent variables remain unobserved. A promising future direction consists of adapting our methodology to nonlinear transformations, which could address more complex, practical challenges, such as identifying latent mechanism shifts in real-world image data.

## References

- [1] Ahuja, K., Mahajan, D., Wang, Y. and Bengio, Y. [2023], ‘Interventional causal representation learning’, in ‘International conference on machine learning’, PMLR, pp. 372–407.
- [2] Auddy, A. and Yuan, M. [2023], ‘Large dimensional independent component analysis: Statistical optimality and computational tractability’, *arXiv preprint arXiv:2303.18156*.
- [3] Bengio, Y., Courville, A. and Vincent, P. [2013], ‘Representation learning: A review and new perspectives’, *IEEE transactions on pattern analysis and machine intelligence* **35**(8), 1798–1828.
- [4] Buchholz, S., Rajendran, G., Rosenfeld, E., Aragam, B., Schölkopf, B. and Ravikumar, P. [2023], ‘Learning linear causal representations from interventions under general nonlinear mixing’, *arXiv preprint arXiv:2306.02235*.
- [5] Budhathoki, K., Janzing, D., Bloebaum, P. and Ng, H. [2021], ‘Why did the distribution change?’, in ‘International Conference on Artificial Intelligence and Statistics’, PMLR, pp. 1666–1674.
- [6] Budhathoki, K., Minorics, L., Blöbaum, P. and Janzing, D. [2022], ‘Causal structure-based root cause analysis of outliers’, in ‘International Conference on Machine Learning’, PMLR, pp. 2357–2369.
- [7] Burgess, C. P., Higgins, I., Pal, A., Matthey, L., Watters, N., Desjardins, G. and Lerchner, A. [2018], ‘Understanding disentangling in  $\beta$ -vae’, *arXiv preprint arXiv:1804.03599*.
- [8] Chapman, B. P., Duberstein, P. R., Sörensen, S. and Lyness, J. M. [2007], ‘Gender differences in five factor model personality traits in an elderly cohort’, *Personality and individual differences* **43**(6), 1594–1603.
- [9] Chen, R. T., Li, X., Grosse, R. B. and Duvenaud, D. K. [2018], ‘Isolating sources of disentanglement in variational autoencoders’, *Advances in neural information processing systems* **31**.
- [10] Chen, T., Bello, K., Aragam, B. and Ravikumar, P. [2023], ‘iSCAN: Identifying Causal Mechanism Shifts among Nonlinear Additive Noise Models’, *Advances in Neural Information Processing Systems*.
- [11] Cohen, E. H. and Deuling, J. K. [2014], ‘Structural analysis of the abridged big five circumplex: A comparison among gender and ethnic groups’, *Bulletin of Sociological Methodology/Bulletin de Méthodologie Sociologique* **122**(1), 63–86.
- [12] Comon, P. [1994], ‘Independent component analysis, a new concept?’, *Signal processing* **36**(3), 287–314.
- [13] Eriksson, J. and Koivunen, V. [2004], ‘Identifiability, separability, and uniqueness of linear ica models’, *IEEE signal processing letters* **11**(7), 601–604.
- [14] Ghoshal, A., Bello, K. and Honorio, J. [2019], ‘Direct learning with guarantees of the difference dag between structural equation models’, *arXiv preprint arXiv:1906.12024*.
- [15] Goldberg, L. R. [1992], ‘The development of markers for the big-five factor structure.’, *Psychological assessment* **4**(1), 26.

- [16] Goldberg, L. R. [2013], An alternative “description of personality”: The big-five factor structure, in ‘Personality and Personality Disorders’, Routledge, pp. 34–47.
- [17] Hyvärinen, A. [1999], ‘Fast and robust fixed-point algorithms for independent component analysis’, *IEEE transactions on Neural Networks* **10**(3), 626–634.
- [18] Hyvärinen, A., Hurri, J., Hoyer, P. O., Hyvärinen, A., Hurri, J. and Hoyer, P. O. [2009], *Independent component analysis*, Springer.
- [19] Hyvärinen, A. and Oja, E. [2000], ‘Independent component analysis: algorithms and applications’, *Neural networks* **13**(4-5), 411–430.
- [20] Hyvärinen, A. and Pajunen, P. [1999], ‘Nonlinear independent component analysis: Existence and uniqueness results’, *Neural networks* **12**(3), 429–439.
- [21] Ikram, A., Chakraborty, S., Mitra, S., Saini, S., Bagchi, S. and Kocaoglu, M. [2022], ‘Root cause analysis of failures in microservices through causal discovery’, *Advances in Neural Information Processing Systems* **35**, 31158–31170.
- [22] Jiang, Y. and Aragam, B. [2023], ‘Learning nonparametric latent causal graphs with unknown interventions’, *arXiv preprint arXiv:2306.02899*.
- [23] Jin, J. and Syrgkanis, V. [2023], ‘Learning causal representations from general environments: Identifiability and intrinsic ambiguity’, *arXiv preprint arXiv:2311.12267*.
- [24] Jolijn Hendriks, A., Perugini, M., Angleitner, A., Ostendorf, F., Johnson, J. A., De Fruyt, F., Hřebíčková, M., Kreitler, S., Murakami, T., Bratko, D. et al. [2003], ‘The five-factor personality inventory: cross-cultural generalizability across 13 countries’, *European journal of personality* **17**(5), 347–373.
- [25] Kajonius, P. and Mac Giolla, E. [2017], ‘Personality traits across countries: Support for similarities rather than differences’, *PloS one* **12**(6), e0179646.
- [26] Kim, H. and Mnih, A. [2018], Disentangling by factorising, in ‘International Conference on Machine Learning’, PMLR, pp. 2649–2658.
- [27] Kulinski, S., Bagchi, S. and Inouye, D. I. [2020], ‘Feature shift detection: Localizing which features have shifted via conditional distribution tests’, *Advances in neural information processing systems* **33**, 19523–19533.
- [28] Li, C., Shen, X. and Pan, W. [2023], ‘Nonlinear causal discovery with confounders’, *Journal of the American Statistical Association* pp. 1–10.
- [29] Löckenhoff, C. E., Chan, W., McCrae, R. R., De Fruyt, F., Jussim, L., De Bolle, M., Costa Jr, P. T., Sutin, A. R., Realo, A., Allik, J. et al. [2014], ‘Gender stereotypes of personality: Universal and accurate?’, *Journal of cross-cultural psychology* **45**(5), 675–694.
- [30] Magliacane, S., Van Ommen, T., Claassen, T., Bongers, S., Versteeg, P. and Mooij, J. M. [2018], ‘Domain adaptation by using causal inference to predict invariant conditional distributions’, *Advances in neural information processing systems* **31**.
- [31] Mameche, S., Kaltenpoth, D. and Vreeken, J. [2024], ‘Learning causal models under independent changes’, *Advances in Neural Information Processing Systems* **36**.
- [32] Matthews, G., Deary, I. J. and Whiteman, M. C. [2003], *Personality traits*, Cambridge University Press.
- [33] Misiakos, P., Wendler, C. and Püschel, M. [2024], ‘Learning dags from data with few root causes’, *Advances in Neural Information Processing Systems* **36**.
- [34] Montagna, F., Noceti, N., Rosasco, L., Zhang, K. and Locatello, F. [2023], ‘Causal discovery with score matching on additive models with arbitrary noise’, *arXiv:2304.03265*.
- [35] Monti, R. P., Zhang, K. and Hyvärinen, A. [2020], Causal discovery with general non-linear relationships using non-linear ica, in ‘Uncertainty in Artificial Intelligence’, PMLR, pp. 186–195.
- [36] Muandet, K., Balduzzi, D. and Schölkopf, B. [2013], Domain generalization via invariant feature representation, in ‘International conference on machine learning’, PMLR, pp. 10–18.
- [37] Pearl, J. [2009], *CAUSALITY: Models, Reasoning, and Inference*, 2nd edn, Cambridge University Press.

- [38] Peters, J., Janzing, D. and Schölkopf, B. [2017], *Elements of causal inference: foundations and learning algorithms*, The MIT Press.
- [39] Schölkopf, B., Locatello, F., Bauer, S., Ke, N. R., Kalchbrenner, N., Goyal, A. and Bengio, Y. [2021], ‘Toward causal representation learning’, *Proceedings of the IEEE* **109**(5), 612–634.
- [40] Seigal, A., Squires, C. and Uhler, C. [2022], ‘Linear causal disentanglement via interventions’, *arXiv preprint arXiv:2211.16467*.
- [41] Shen, H., Jegelka, S. and Gretton, A. [2009], ‘Fast kernel-based independent component analysis’, *IEEE Transactions on Signal Processing* **57**(9), 3498–3511.
- [42] Shimizu, S., Hoyer, P. O. and Hyvärinen, A. [2009], ‘Estimation of linear non-gaussian acyclic models for latent factors’, *Neurocomputing* **72**(7-9), 2024–2027.
- [43] Shimizu, S., Hoyer, P. O., Hyvärinen, A., Kerminen, A. and Jordan, M. [2006], ‘A linear non-gaussian acyclic model for causal discovery.’, *Journal of Machine Learning Research* **7**(10).
- [44] Shimizu, S., Hyvarinen, A., Kano, Y. and Hoyer, P. O. [2012], ‘Discovery of non-gaussian linear causal models using ica’, *arXiv preprint arXiv:1207.1413*.
- [45] Silva, R., Scheines, R., Glymour, C., Spirtes, P. and Chickering, D. M. [2006], ‘Learning the structure of linear latent variable models.’, *Journal of Machine Learning Research* **7**(2).
- [46] Soto, C. J., John, O. P., Gosling, S. D. and Potter, J. [2011], ‘Age differences in personality traits from 10 to 65: Big five domains and facets in a large cross-sectional sample.’, *Journal of personality and social psychology* **100**(2), 330.
- [47] Sturma, N., Squires, C., Drton, M. and Uhler, C. [2023], ‘Unpaired multi-domain causal representation learning’, *arXiv preprint arXiv:2302.00993*.
- [48] Varici, B., Acarturk, E., Shanmugam, K., Kumar, A. and Tajer, A. [2023], ‘Score-based causal representation learning with interventions’, *arXiv preprint arXiv:2301.08230*.
- [49] Varici, B., Acartürk, E., Shanmugam, K. and Tajer, A. [2023], ‘General identifiability and achievability for causal representation learning’, *arXiv preprint arXiv:2310.15450*.
- [50] von Kügelgen, J., Besserve, M., Wendong, L., Gresele, L., Kekić, A., Bareinboim, E., Blei, D. M. and Schölkopf, B. [2023], ‘Nonparametric identifiability of causal representations from unknown interventions’, *arXiv preprint arXiv:2306.00542*.
- [51] Wang, Y. and Jordan, M. I. [2021], ‘Desiderata for representation learning: A causal perspective’, *arXiv preprint arXiv:2109.03795*.
- [52] Wang, Y., Squires, C., Belyaeva, A. and Uhler, C. [2018], ‘Direct estimation of differences in causal graphs’, *Advances in neural information processing systems* **31**.
- [53] Wu, P. and Fukumizu, K. [2020], Causal mosaic: Cause-effect inference via nonlinear ica and ensemble method, in ‘International Conference on Artificial Intelligence and Statistics’, PMLR, pp. 1157–1167.
- [54] Yang, M., Liu, F., Chen, Z., Shen, X., Hao, J. and Wang, J. [2021], Causalvae: Disentangled representation learning via neural structural causal models, in ‘Proceedings of the IEEE/CVF conference on computer vision and pattern recognition’, pp. 9593–9602.
- [55] Zhang, H., Zhang, Y.-F., Liu, W., Weller, A., Schölkopf, B. and Xing, E. P. [2022], Towards principled disentanglement for domain generalization, in ‘Proceedings of the IEEE/CVF Conference on Computer Vision and Pattern Recognition’, pp. 8024–8034.
